# Supplementary material
Source: MDPI journal article supplement (https://www.mdpi.com/2571-5577/3/1/6)
Supplement: s1 [file s1]

# Supplementary Materials: Determinants of Bicycle Use among Student Population: Exploratory Research of Social and Infrastructure Factors

Kaja Pogačar <sup>1</sup>, Lucija Dežan <sup>2</sup>, Monika Lamot <sup>3</sup> and Marko Renčelj <sup>4,\*</sup>

<sup>1</sup> Department of Architecture, Faculty of Civil Engineering, Transportation Engineering and Architecture, University of Maribor, Smetanova ulica 17, 2000 Maribor, Slovenia; kaja.pogacar@um.si

<sup>2</sup> Institute for Social Studies, Science and Research Centre Koper, Garibaldijeva ulica 1, 6000 Koper, Slovenia; lucija.dezan@zrs-kp.si

<sup>3</sup> Department of Sociology, Faculty of Arts, University of Maribor, Koroška cesta 160, 2000 Maribor, Slovenia; monika.lamot@student.um.si

<sup>4</sup> Department of Civil Engineering, Faculty of Civil Engineering, Transportation Engineering and Architecture, University of Maribor, Smetanova ulica 17, 2000 Maribor, Slovenia

\* Correspondence: marko.rencelj@um.si; Tel.: +386-51-375134

**Table S1.** The questionnaire used in our research.

|                                                                       |
|-----------------------------------------------------------------------|
| <b>1. How often did you cycle in <u>the last year</u> in Maribor?</b> |
| a) Never                                                              |
| b) A few times                                                        |
| c) 1-3 times per month                                                |
| d) 4-10 times per month                                               |
| e) Almost every day or every day                                      |

Please skip this question if you have answered »never« in question 1.

|                                                                                                                                                                       |       |        |              |       |   |
|-----------------------------------------------------------------------------------------------------------------------------------------------------------------------|-------|--------|--------------|-------|---|
| <b>2. How often do you cycle due to these reasons? »I cycle ...«</b>                                                                                                  |       |        |              |       |   |
| (With each sentence choose only one option)                                                                                                                           |       |        |              |       |   |
|                                                                                                                                                                       | never | rarely | occasionally | often |   |
| <b>when I go to the faculty, to work, etc.</b>                                                                                                                        |       |        |              |       |   |
| <b>when I have errands (store, post office, bank, etc.).</b>                                                                                                          |       |        |              |       |   |
| <b>in my free time (hanging out with friends, free time activities).</b>                                                                                              |       |        |              |       |   |
| <b>3. How encouraging are these factors in your decision to cycle?</b>                                                                                                |       |        |              |       |   |
| (1 = they are not encouraging at all, 2 = they are not encouraging, 3 = neither encouraging or discouraging, 4 = they are encouraging, 5 = they are very encouraging) |       |        |              |       |   |
| <b>It allows me to save money.</b>                                                                                                                                    | 1     | 2      | 3            | 4     | 5 |
| <b>It is the fastest way to come from point A to point B.</b>                                                                                                         | 1     | 2      | 3            | 4     | 5 |
| <b>Flexibility of the departure time.</b>                                                                                                                             | 1     | 2      | 3            | 4     | 5 |
| <b>I have friends who recreationally cycle with me.</b>                                                                                                               | 1     | 2      | 3            | 4     | 5 |
| <b>I do not have a car.</b>                                                                                                                                           | 1     | 2      | 3            | 4     | 5 |
| <b>Bike-sharing system.</b>                                                                                                                                           | 1     | 2      | 3            | 4     | 5 |
| <b>Cycling helps me to take care for health.</b>                                                                                                                      | 1     | 2      | 3            | 4     | 5 |
| <b>Cycling is my pleasure.</b>                                                                                                                                        | 1     | 2      | 3            | 4     | 5 |

**4. How important are the following factors for safe cycling surface in Maribor? (1 = not important at all, 2 = not important, 3 = neither important or unimportant, 4 = important, 5 = very important)**

|                                                                                  |   |   |   |   |   |         |
|----------------------------------------------------------------------------------|---|---|---|---|---|---------|
| Properly maintained and safe passages of cycling surface (through road surface). | 1 | 2 | 3 | 4 | 5 | No idea |
| Physically divided (curb, lawn) cycling surface from the motor traffic.          | 1 | 2 | 3 | 4 | 5 | No idea |
| Low number of motor traffic on the roadway and low speed of motor traffic.       | 1 | 2 | 3 | 4 | 5 | No idea |
| Offset of the cycling surface from the obstacles (objects, poles).               | 1 | 2 | 3 | 4 | 5 | No idea |
| Cycling surface on the roadway.                                                  | 1 | 2 | 3 | 4 | 5 | No idea |
| Cycling surface on a pavement.                                                   | 1 | 2 | 3 | 4 | 5 | No idea |
| Appropriate stand, parking lot for bicycle.                                      | 1 | 2 | 3 | 4 | 5 | No idea |

**5. To what extent do you agree that following factors present an obstacle for your cycling? (1 = not agree at all, 2 = disagree, 3 = neither agree or disagree, 4 = agree, 5 = fully agree)**

|                                                                |   |   |   |   |   |
|----------------------------------------------------------------|---|---|---|---|---|
| I do not have a bike.                                          | 1 | 2 | 3 | 4 | 5 |
| Fear that someone will steal my bike.                          | 1 | 2 | 3 | 4 | 5 |
| Lack of skills to ride a bike.                                 | 1 | 2 | 3 | 4 | 5 |
| I have shopping bags, school bag or other cargo with me.       | 1 | 2 | 3 | 4 | 5 |
| Faculty/work provides no option to take a shower or to change. | 1 | 2 | 3 | 4 | 5 |
| I live too far from the point I am off to.                     | 1 | 2 | 3 | 4 | 5 |
| Lack of cycling surface for safe cycling in the city.          | 1 | 2 | 3 | 4 | 5 |
| I am not in best shape.                                        | 1 | 2 | 3 | 4 | 5 |
| Fear of sharing space with motor vehicles.                     | 1 | 2 | 3 | 4 | 5 |
| Inconvenient weather circumstances (rain, snow, heat, cold)    | 1 | 2 | 3 | 4 | 5 |
| The route is too steep.                                        | 1 | 2 | 3 | 4 | 5 |
| Cycling takes too much time.                                   | 1 | 2 | 3 | 4 | 5 |
| I am new in town and do not know cycling paths.                | 1 | 2 | 3 | 4 | 5 |
| Other:                                                         |   |   |   |   |   |

**6. To what extent do you agree with the following statements? (1 = not agree at all, 2 = disagree, 3 = neither agree or disagree, 4 = agree, 5 = fully agree)**

|                                                                   |   |   |   |   |   |
|-------------------------------------------------------------------|---|---|---|---|---|
| I often practice a sport.                                         | 1 | 2 | 3 | 4 | 5 |
| When I am cycling, I contribute to climate change reduction.      | 1 | 2 | 3 | 4 | 5 |
| People who cycle do not have money for a car.                     | 1 | 2 | 3 | 4 | 5 |
| Cyclists spend plenty of money for a bike.                        | 1 | 2 | 3 | 4 | 5 |
| When I am cycling, I contribute to local air pollution reduction. | 1 | 2 | 3 | 4 | 5 |
| You seem odd if you cycle in Maribor.                             | 1 | 2 | 3 | 4 | 5 |
| My parents encouraged me to cycle during my childhood.            | 1 | 2 | 3 | 4 | 5 |
| I often see people who go to a shop with a bicycle.               | 1 | 2 | 3 | 4 | 5 |
| Drivers in Maribor are attentive to the cyclists.                 | 1 | 2 | 3 | 4 | 5 |
| My family members often cycle.                                    | 1 | 2 | 3 | 4 | 5 |
| Maribor has a good bike service.                                  | 1 | 2 | 3 | 4 | 5 |
| I do not feel like cycling.                                       | 1 | 2 | 3 | 4 | 5 |
| Cycling is cool.                                                  | 1 | 2 | 3 | 4 | 5 |
| Type of transport expresses my social status.                     | 1 | 2 | 3 | 4 | 5 |

|                                                                                            |   |   |   |   |   |   |   |   |    |
|--------------------------------------------------------------------------------------------|---|---|---|---|---|---|---|---|----|
| <b>7. How would you generally assess the quality of bicycle infrastructure in Maribor?</b> |   |   |   |   |   |   |   |   |    |
| 1                                                                                          | 2 | 3 | 4 | 5 | 6 | 7 | 8 | 9 | 10 |

|                                                                                                                 |
|-----------------------------------------------------------------------------------------------------------------|
| <b>8. How familiar are you with the activities of Maribor's Cycling Net (Mariborska kolesarska mreža –MKM)?</b> |
| a) Completely unfamiliar.                                                                                       |
| b) I heard about them.                                                                                          |
| c) Familiar.                                                                                                    |

|                                                                                                    |
|----------------------------------------------------------------------------------------------------|
| <b>9. Here you can write down your suggestions and observations related to cycling in Maribor:</b> |
|                                                                                                    |

|                                                                                      |
|--------------------------------------------------------------------------------------|
| <b>How far from the faculty do you live during the lecture time (approximately)?</b> |
| a) Less than 3 km                                                                    |
| b) 3 - 5 km                                                                          |
| c) 5 - 10 km                                                                         |
| d) More than 10 km                                                                   |

|                                                      |
|------------------------------------------------------|
| <b>During the lecture time I live in Maribor in:</b> |
| a) Dormitory                                         |
| b) (private) flat                                    |
| c) At home (with my parents)                         |
| d) Other                                             |

Do you have at your disposal a car that you frequently drive? YES NO

Gender: Male Female

AGE: \_\_\_\_\_

|                 |      |      |     |
|-----------------|------|------|-----|
| <b>Faculty:</b> |      |      |     |
|                 | FF   | FGPA | FNM |
|                 | EPF  | FKKT | FS  |
|                 | FERI | PF   | MF  |
|                 | PeF  | FZV  |     |

| <b>Year of study</b> |   |   |   |   |   |
|----------------------|---|---|---|---|---|
| 1                    | 2 | 3 | 4 | 5 | 6 |

| <b>The highest formal education of one of your parents:</b><br>(choose a parent with a higher education) |        |
|----------------------------------------------------------------------------------------------------------|--------|
| a) <b>elemental (primary) school</b>                                                                     | d) BA  |
| b) <b>vocational school</b>                                                                              | e) MA  |
| c) <b>grammar school</b>                                                                                 | f) PhD |
